# Supplementary material for: Anionic 3D cage networks self-assembled by iodine and V-shaped pentaiodides using dimeric oxoammonium cations produced in situ as templates
Source: Royal Society of Chemistry journal article supplement (doi:10.1039/c3dt50191d), 2013-01-01

## Anionic 3D cage networks self-assembled by iodine and V-shaped pentaiodides using dimeric oxoammonium cations produced *in situ* as templates

Xue Pang, Hui Wang, Xiao Ran Zhao, and Wei Jun Jin\*

College of Chemistry, Beijing Normal University, Beijing 100875 (P. R. China)

E-mail: [wjjin@bnu.edu.cn](mailto:wjjin@bnu.edu.cn) Tel/Fax: (+86)10-58802146

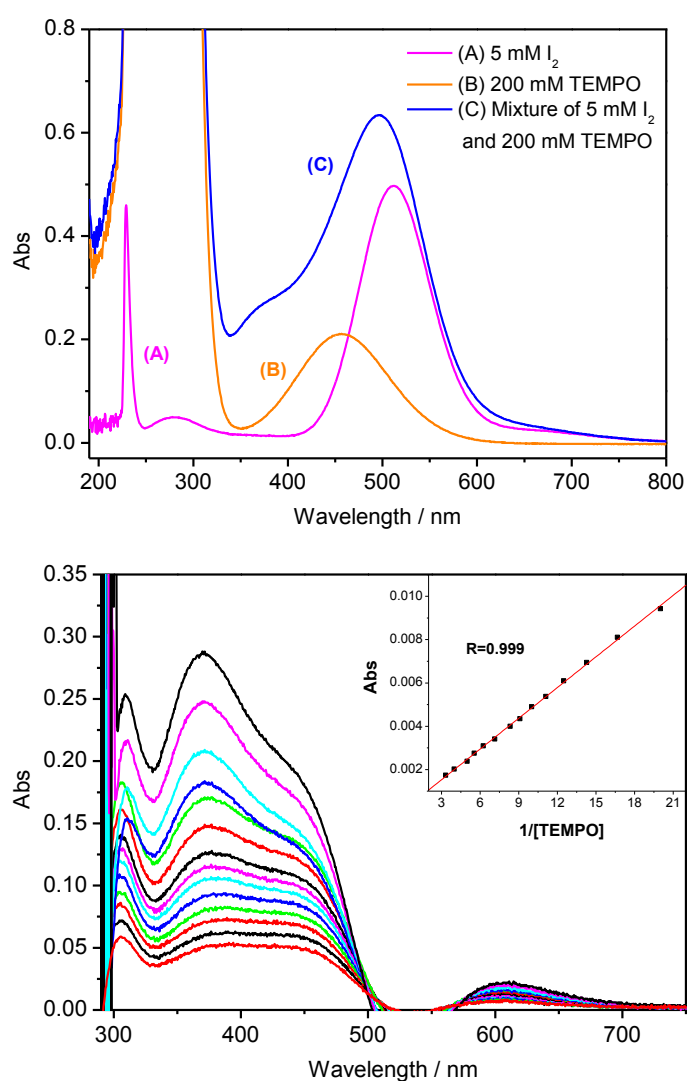

**Fig. S1** (Up) UV-Vis absorption spectra of (A) 5 mM I<sub>2</sub>, (B) 200 mM TEMPO, (C) mixture of 5 mM I<sub>2</sub> and 200 mM TEMPO in chloroform. (Down) Subtracted UV-Vis titration spectra to confirm the XB complex between I<sub>2</sub> and TEMPO in chloroform (inset line shows the double reciprocal Benesi-Hildebrand plot to obtain the stoichiometry, formation constant and extinction coefficient).  $K_{\text{XBC}} : 0.22 \text{ M}^{-1}$  and  $\epsilon_{\text{XBC}} : 2.73 \times 10^3 \text{ M}^{-1} \cdot \text{cm}^{-1}$  in chloroform.

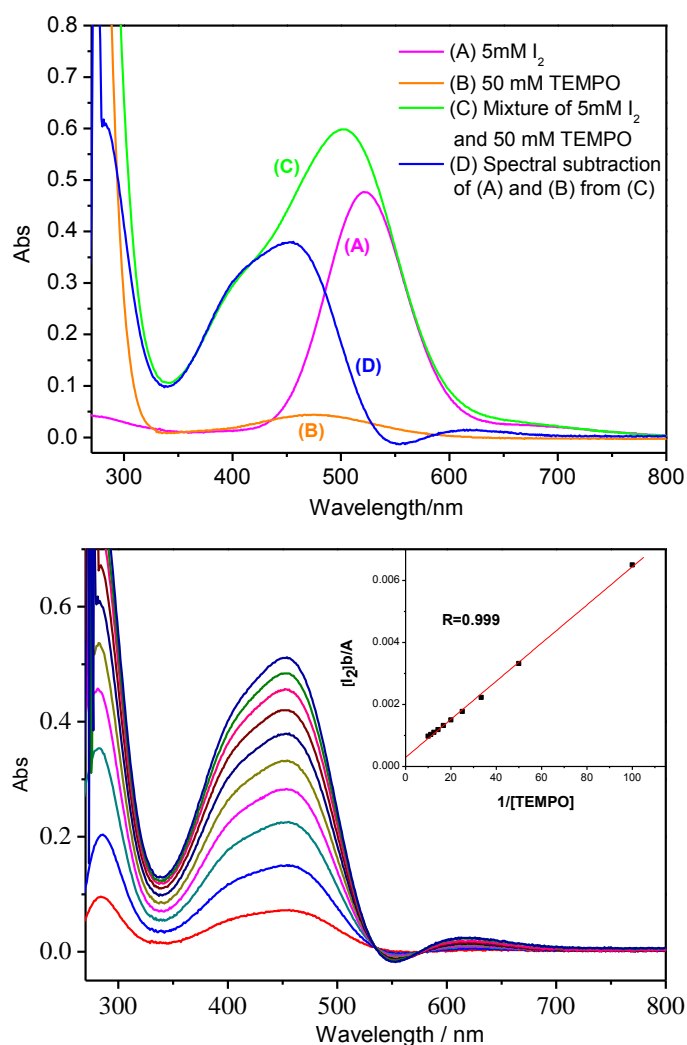

**Fig. S2** (Up) UV-Vis absorption spectra of (A) 5 mM I<sub>2</sub>, (B) 50 mM TEMPO, (C) mixture of 5 mM I<sub>2</sub> and 50 mM TEMPO, (D) spectral subtraction of (A) and (B) from (C) in *n*-hexane. (Down) Subtracted UV titration spectra to confirm the XB complex between I<sub>2</sub> and TEMPO in *n*-hexane (inset line shows the double reciprocal Benesi-Hildebrand plot to obtain the stoichiometry, formation constant and extinction coefficient).  $K_{\text{XBC}} : 4.8 \text{ M}^{-1}$  and  $\epsilon_{\text{XBC}} : 2.92 \times 10^3 \text{ M}^{-1} \cdot \text{cm}^{-1}$  in *n*-hexane.

**Scheme S1.** Possible reaction processes for some relevant fragments.

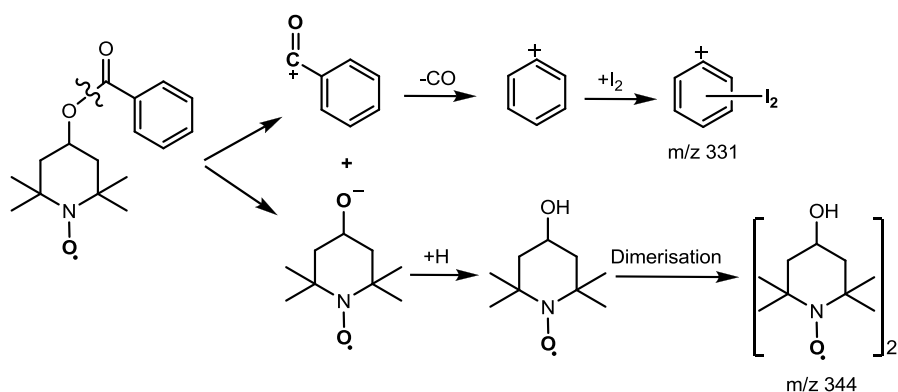

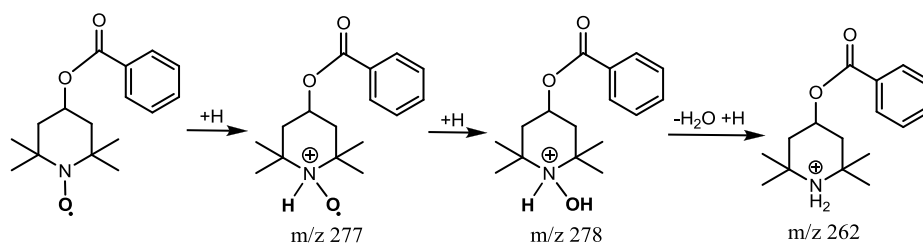

Supplement: c3dt50191d.pdf [file c3dt50191d.pdf]
